# Supplementary material for: Template and interfacial reaction engaged synthesis of CeMnOx hollow nanospheres and their performance for toluene oxidation
Source: Royal Society of Chemistry journal article supplement (doi:10.1039/d2ra04678d), 2022-01-01
Supplement: d2ra04678d1.pdf [file d2ra04678d1.pdf]

## Electronic Supplementary Information

### Experimental

#### 1. Synthesis of $\text{SiO}_2@ \text{CeO}_2$

$\text{SiO}_2$  used here was prepared by a modified Stöber method [29]. Typically, 9 mL ammonia and 25 mL deionized water were added into 60 mL anhydrous ethanol to form a mixture at room temperature. Followed by magnetic stirring for 10 min, 4 mL TEOS was dropped into the mixture above, and the colloid  $\text{SiO}_2$  can be obtained after stirring for 4 h. The colloid was centrifuged and washed several times with water and ethanol. Finally,  $\text{SiO}_2$  spheres were dried at 60 °C for 12 h. To coat  $\text{CeO}_2$  on the  $\text{SiO}_2$  spheres, 30 mL of  $\text{Ce}(\text{NO}_3)_3 \cdot 6\text{H}_2\text{O}$  solution (0.35 mol/L) was added into suspension containing 1.5 g of as-prepared  $\text{SiO}_2$  spheres and 180 mL of ethanol. After stirring for 0.5 h, the suspension was transferred to Teflon-lined stainless-steel autoclaves and was treated at 140 °C for 12 h in an oven. The obtained precipitates were collected and purified with water and ethanol several times.

#### 2. Synthesis of $\text{CeMnO}_x$ hollow nanospheres

To synthesize  $\text{CeMnO}_x$  composites, Mn element was added into  $\text{CeO}_2$  by reduction of  $\text{KMnO}_4$ . Specifically, 20 mL  $\text{KMnO}_4$  solution with different concentrations were added into suspension containing the as-synthesized  $\text{SiO}_2@ \text{CeO}_2$ . After stirring for 12 h at 25 °C, the dark brown precipitates were separated, washed, and dried at 60 °C overnight. To enhance the interaction between Ce and Mn, the precipitates were calcined at 500 °C for 1 h. Finally,  $\text{SiO}_2$  templates were removed by treating the collected gray powder with 1.0 M NaOH solution three times. The samples treated with  $\text{KMnO}_4$  solution of different concentrations (0.002, 0.004, 0.008, 0.012, and 0.025 g/L) were denoted as  $\text{CeMnO}_x$ -1, -2, -3, -4, and -5, respectively.

### *3. Structural and compositional Characterization*

X-ray diffraction was performed on a Smartlab type XRD-meter (Japan) utilizing a Cu K $\alpha$  radiation source. The catalysts were scanned over the range of  $2\theta$  from 25 to 65 °. The actual content of Ce and Mn in the catalysts was measured by inductively coupled plasma-atomic emission spectrometry measurements (ICP-AES, Shimadzu ICPE-9800).

The N<sub>2</sub> desorption/adsorption experiment was carried out on ASAP 2020 instrument (Micromeritics Inc.) after degassing at 300 °C for 4 h under vacuum. Scanning electron microscopy (SEM) investigation was obtained by using a Hitachi SU8020 microscope operated at 5.0 kV. Transmission electron microscopy (TEM) images were obtained on a transmission electron microscope (FEI Tecnai G2 F20) with an accelerating voltage of 200 kV.

X-ray photoelectron spectra (XPS) were performed on a Thermo Scientific K-Alpha analyzer using Al K $\alpha$  X-ray radiation at 1486.6 eV) to obtain the oxidation states of Ce, Mn, and O. The XPS spectra were calibrated based on the binding energy (BE) of C1s core level, 284.6 eV. The ratio of elements with different valence states was computed with the peak area using XPS-PEAK software. Temperature-programmed reduction of H<sub>2</sub> (H<sub>2</sub>-TPR) was carried out on an AutoChem II chemisorption analyzer (Micromeritics Inc.) equipped with a thermal conductivity detector (TCD). Before the measurement, 50 mg of catalyst was pre-treated in N<sub>2</sub> (40 mL/min) at 200 °C for 1 h, and then cooled down to room temperature. The subsequent reducing procedure was carried out in 5 vol. % H<sub>2</sub>/Ar at a flow rate of 40 mL/min while the temperature was set from 25 °C to 800 °C with a heating rate of 10 °C /min.

### *4. Catalytic activity tests*

The catalytic performance of CeMnO<sub>x</sub> for toluene oxidation was investigated by

loading 50 mg of the composite catalyst into a tubular fixed-bed glass reactor (i.d. 10 mm) at atmospheric pressure. The feed gas composed of 1000 ppm toluene (volume ppm) was generated by passing air through a reactor containing pure toluene in an ice bath at a total flow rate of 100 mL·min<sup>-1</sup>, corresponding to a gas hourly space velocity (GHSV) of about 120,000 h<sup>-1</sup>. The water resistance test of the catalyst was performed by the introduction of 5 vol.% H<sub>2</sub>O vapors through a water vapor generator. The products of the catalytic reaction were analyzed using an online gas chromatography (GC-7820A), coupled with a methane conversion furnace and FID.

The removal efficiency (X) of toluene, normalized conversion rate (r) and apparent activation energy (E<sub>a</sub>) of this reaction were calculated with the following equations:

$$X(\%) = \frac{C_{in} - C_{out}}{C_{in}} * 100\%$$

$$r(\mu\text{mol} \cdot \text{g}^{-1} \text{s}^{-1}) = \frac{C_{in} * X * V}{m_{cat}}$$

$$\ln r = -\frac{E_a}{R} * \frac{1}{T} + \ln A'$$

C<sub>in</sub> and C<sub>out</sub> represent the toluene concentration in the inlet and outlet gas, respectively; V is the flow rate of feed gas with the unit of mol·s<sup>-1</sup>; the molar volume of gas used in the equation is 22.4 L·mol<sup>-1</sup>; m<sub>cat</sub> is the mass of the catalyst; R was proportional constant; T (K) is reaction temperature; the unit of E<sub>a</sub> is kJ·mol<sup>-1</sup>.

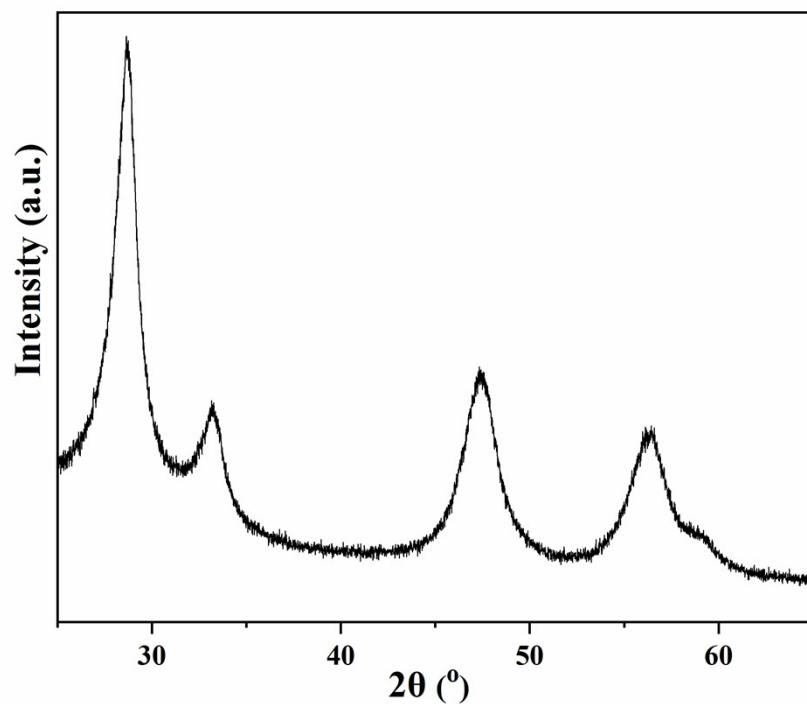

Fig. S1 XRD pattern of  $\text{SiO}_2@\text{CeO}_2$  obtained by solvothermal method directly.

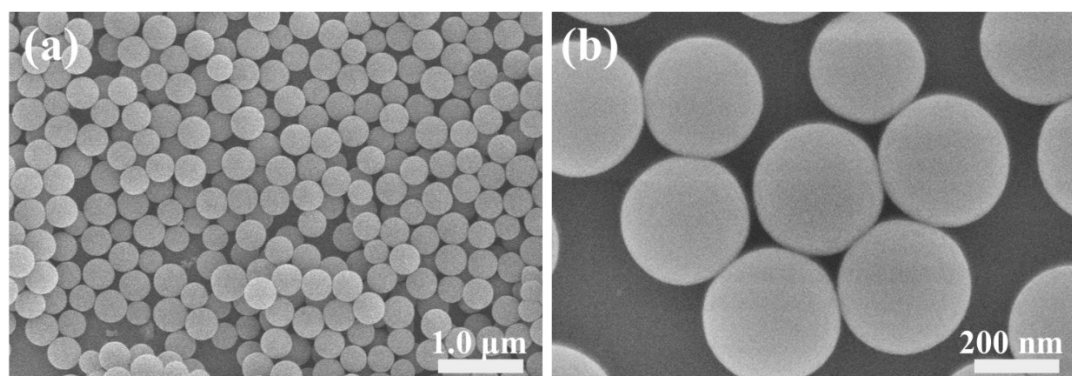

Fig. S2 SEM images of  $\text{SiO}_2$  templates with low (a) and high (b) magnification.

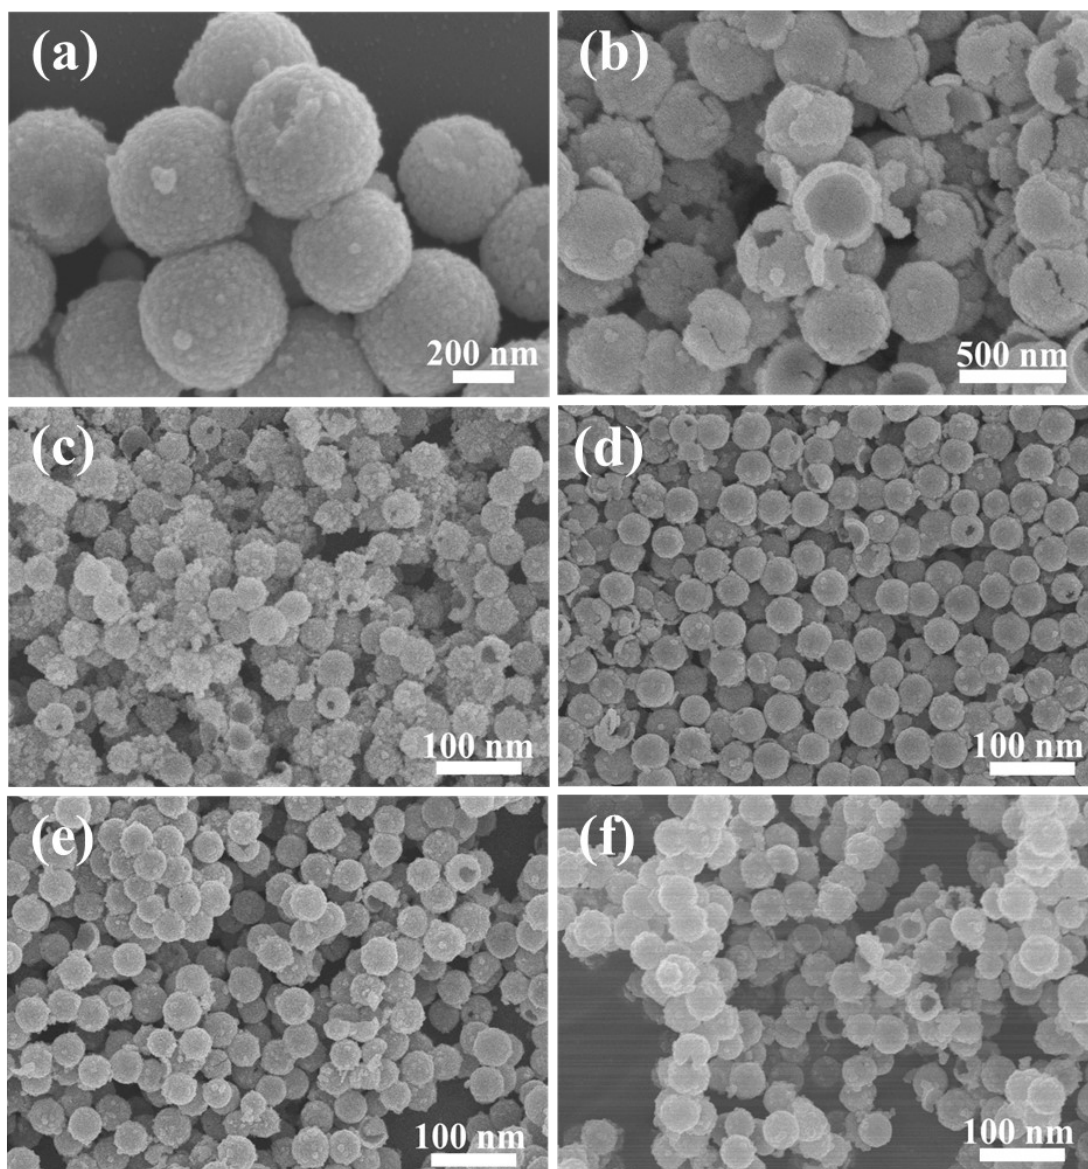

Fig. S3 SEM images of  $\text{SiO}_2@\text{CeO}_2$  before NaOH treatment (a), and the as-prepared  $\text{CeO}_2$  (b),  $\text{CeMnO}_x$ -1 (c),  $\text{CeMnO}_x$ -2 (d),  $\text{CeMnO}_x$ -4 (e), and  $\text{CeMnO}_x$ -5 (f) hollow sphered catalysts.
